# Supplementary material
Source: publisher figshare collection journal article supplement (https://aacr.figshare.com/articles/dataset/_/22820368)

# Supplementary Figure 3

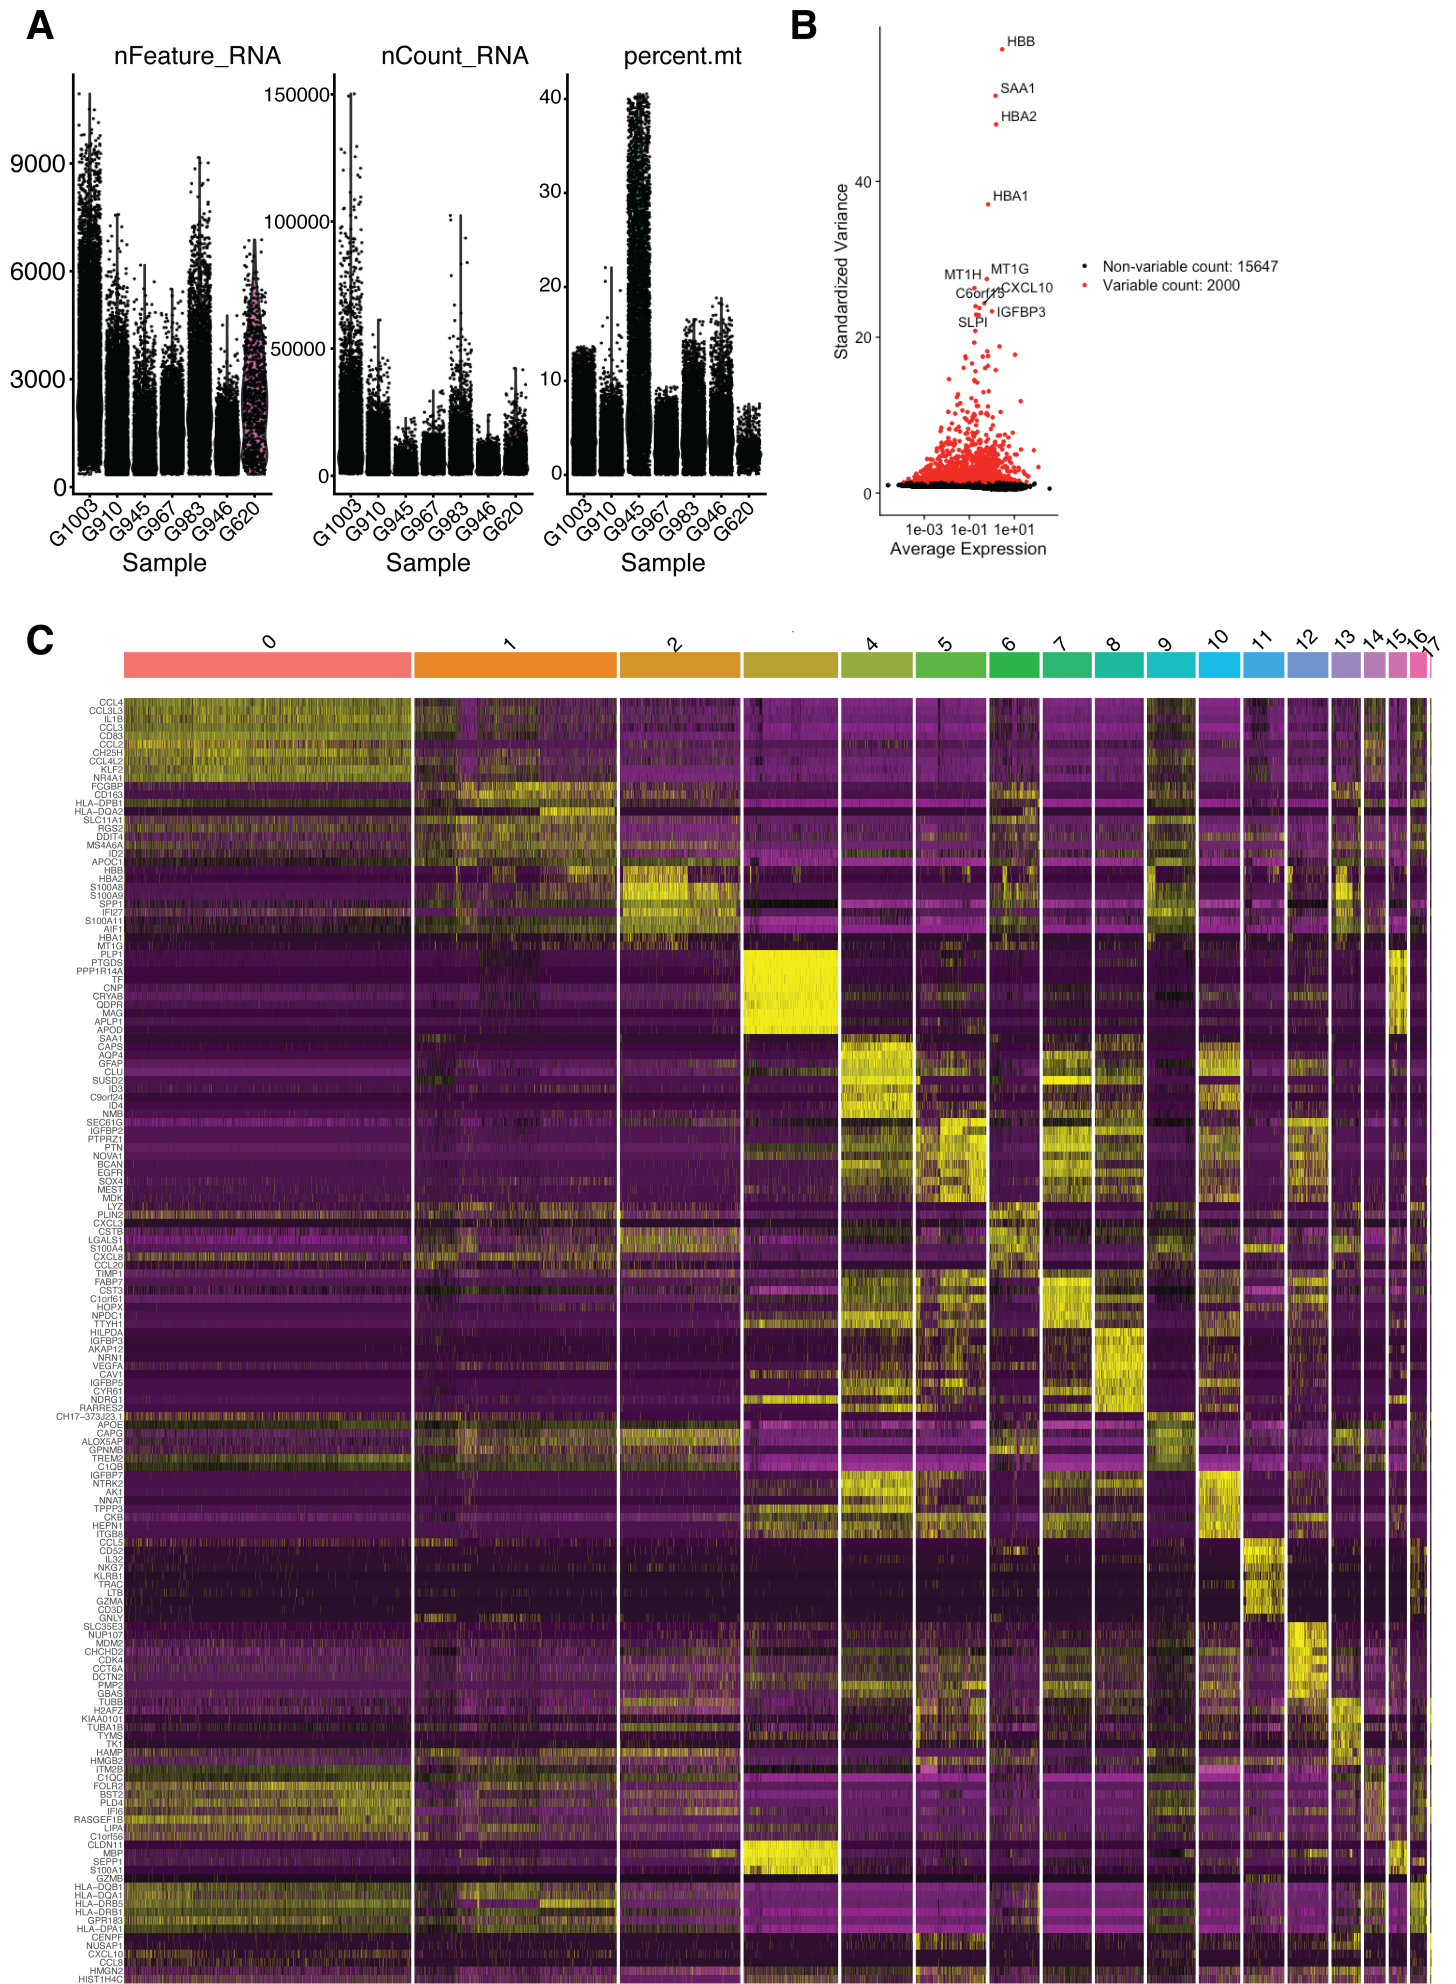

Supplement: Supplementary file 1 [file 40570639]
